# Supplementary material
Source: PubMed Central journal article supplement (PMC6486835)

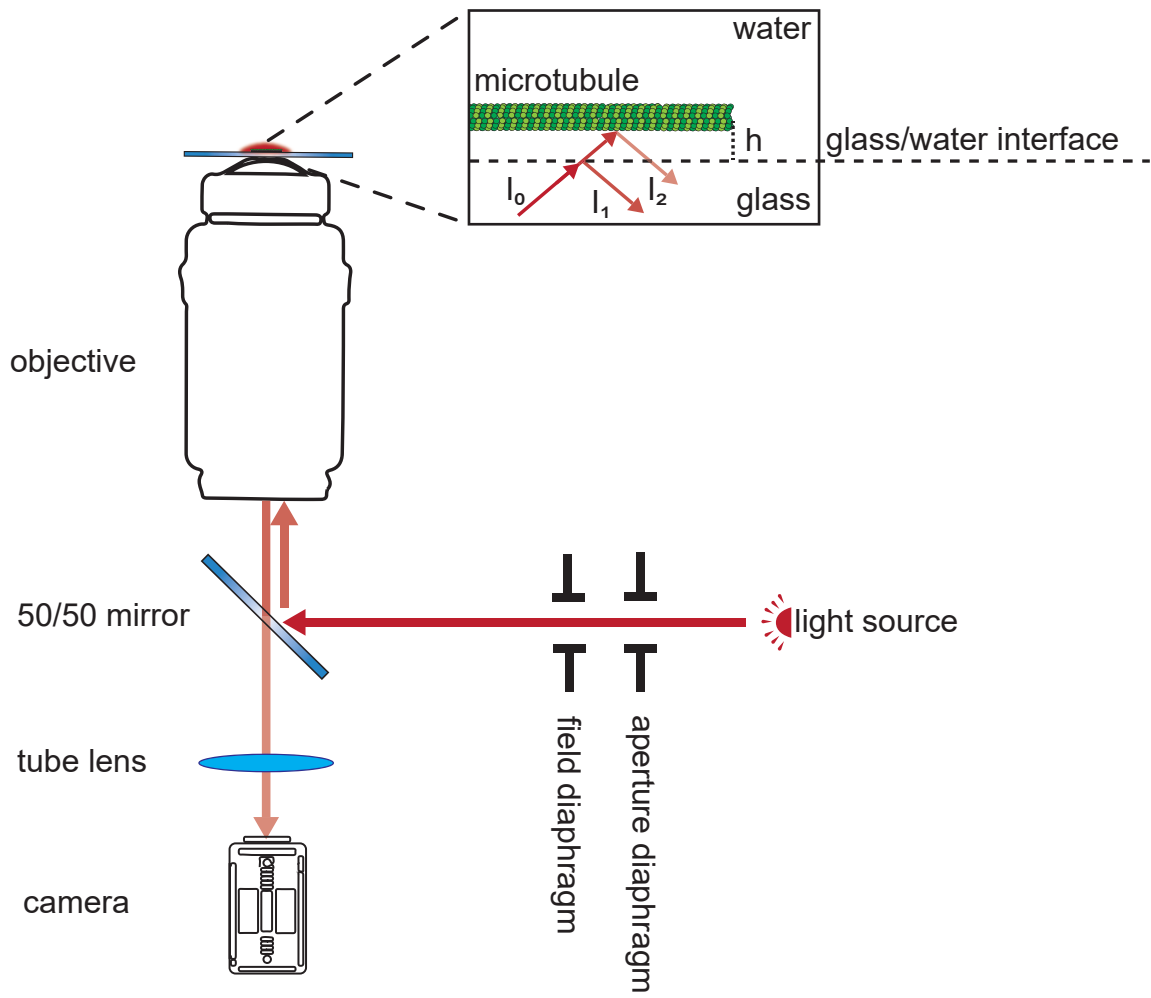

Supplement: NIHMS1020605-supplement-s1.pdf [file NIHMS1020605-supplement-s1.pdf]

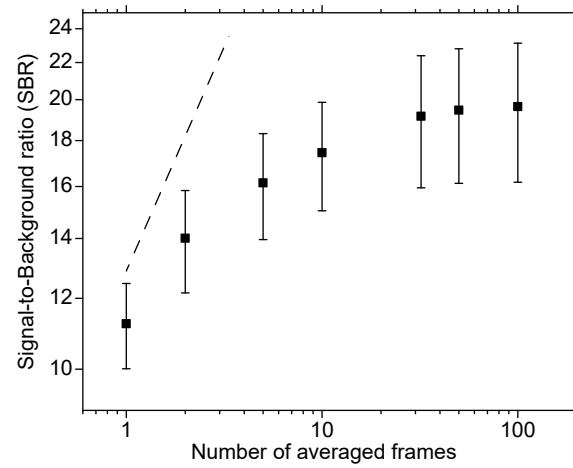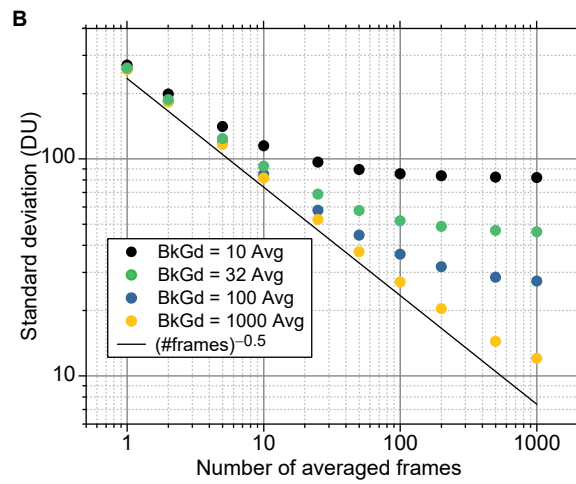

Supplement: NIHMS1020605-supplement-s2.pdf [file NIHMS1020605-supplement-s2.pdf]

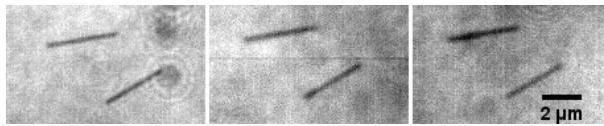

Nikon Plan Apo  $\lambda$   
100x/1.45  
phase

Nikon CFI Apo TIRF  
100x/1.49  
DIC prism in

Nikon CFI Plan Fluor  
100x/1.3

Supplement: NIHMS1020605-supplement-s3.pdf [file NIHMS1020605-supplement-s3.pdf]

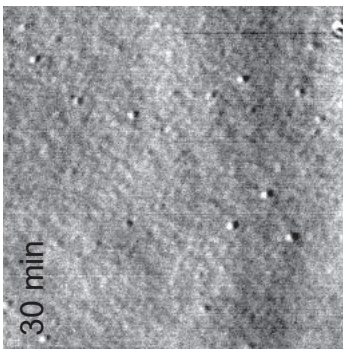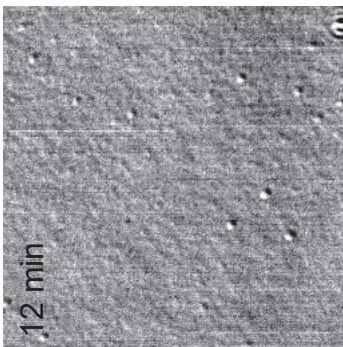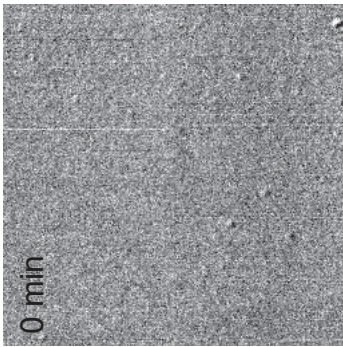

Supplement: NIHMS1020605-supplement-s4.pdf [file NIHMS1020605-supplement-s4.pdf]
